# Supplementary material for: Medicare Changes in Response to COVID-19: Unintended Effects for Beneficiaries With Mental Illness or Substance Use Disorders
Source: Atypon-hosted journal article supplement (doi:10.1176/appi.ps.20220502), 2023-06-08
Supplement: appi.ps.20220502.ds001.pdf [file appi.ps.20220502.ds001.pdf]

Table A1: Types of subject-matter experts convened as part of a modified Delphi panel in June 2022

| <b>Stakeholder Group</b>                                   | <b>Total Interviewees</b> |
|------------------------------------------------------------|---------------------------|
| Academic Researchers                                       | 6                         |
| Executive Leadership of National Professional Organization | 5                         |
| Medical Practitioner                                       | 3                         |
| Non-Profit/Advocacy Organization                           | 6                         |
